# Supplementary material
Source: publisher figshare collection journal article supplement (https://acs.figshare.com/ndownloader/files/4559887)
Supplement: Supplementary file 1 [file 4559887]

## SUPPORTING INFORMATION

### Hydrothermal Synthesis of Hierarchical Nanocolumns of Cobalt Hydroxide and Cobalt Oxide

Yongzheng Shao, Jing Sun and Lian Gao

*State Key Laboratory of High Performance Ceramics and Superfine Microstructure, Shanghai Institute of Ceramics, Chinese Academy of Sciences, Shanghai 200050, P. R. China.*

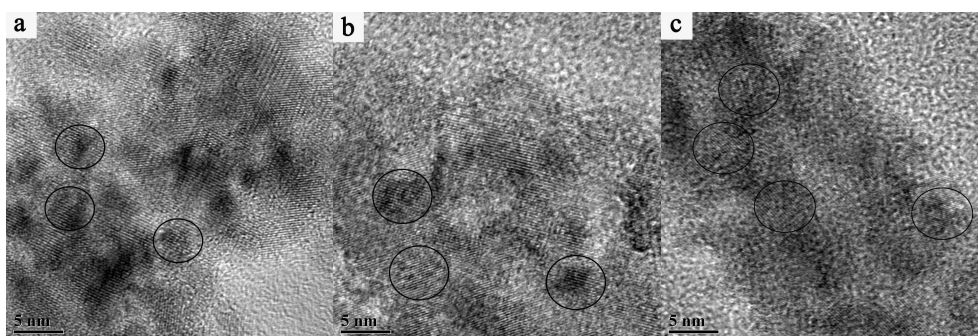

**Figure S1.** The high magnification TEM image of  $\text{Co}_3\text{O}_4$ : (a) stem of nanocolumn, (b) side-nanoplatelet of nanocolumn, (c) nanorod.

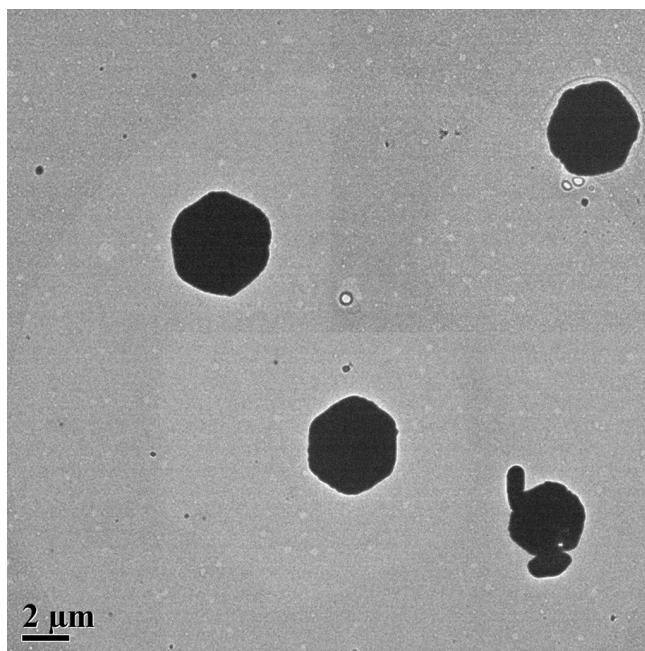

**Figure S2.** TEM image of the products obtained without  $\text{Na}_3\text{PO}_4$ .

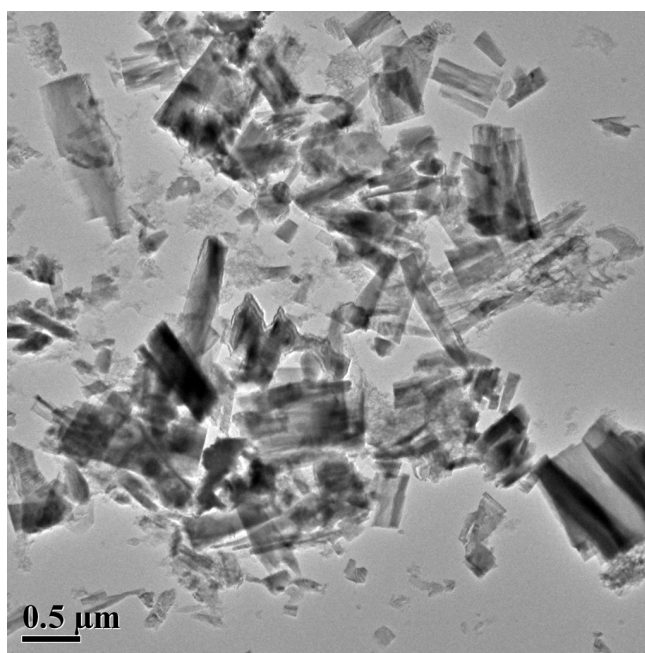

**Figure S3.** TEM image of the products obtained with ammonia instead of hydrazine hydrate.

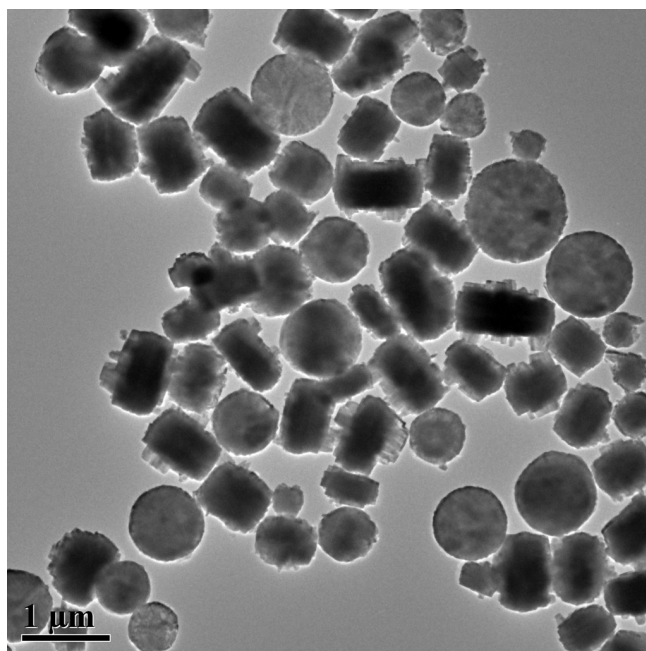

**Figure S4.** TEM image of the products obtained when  $\text{Na}_3\text{PO}_4$  is 4 mg.

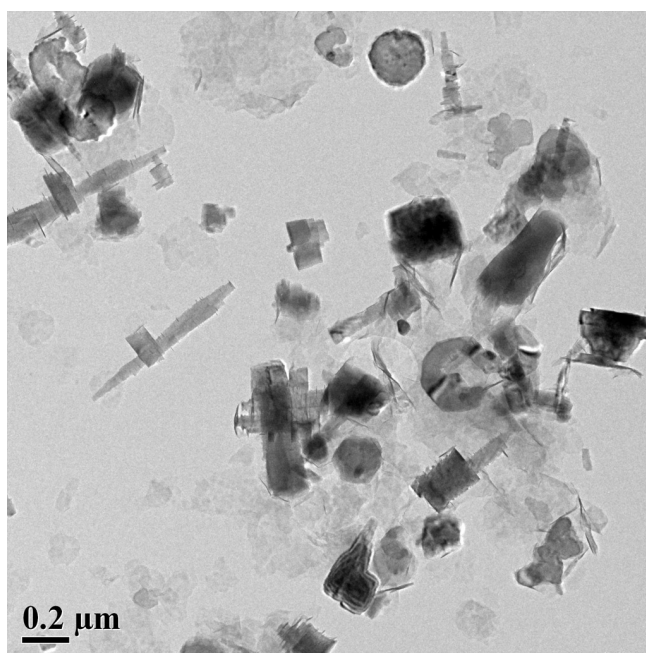

**Figure S5.** TEM image of the products obtained when  $\text{Na}_3\text{PO}_4$  is 19 mg.

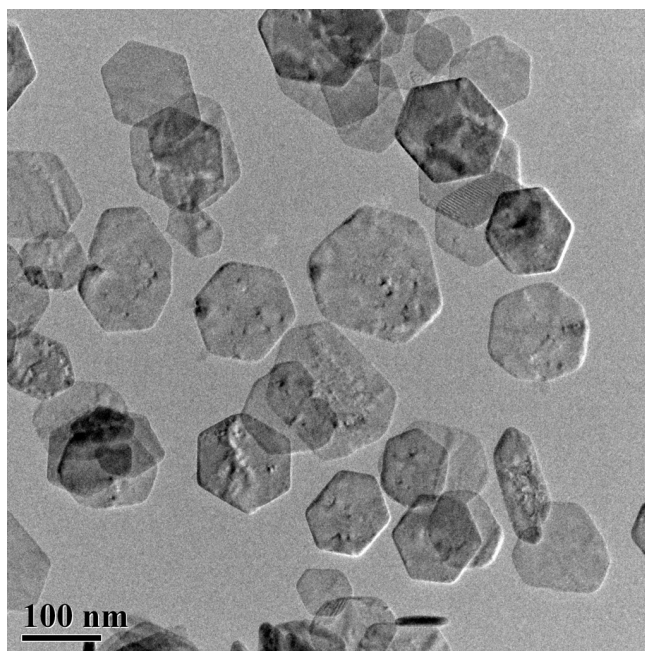

**Figure S6.** TEM image of the products obtained when pH is 12.
